# Supplementary material for: Walk, Talk and Listen: a pilot randomised controlled trial targeting functional fitness and loneliness in older adults with hearing loss
Source: PubMed Central journal article supplement — BMJ Open. 2019 Apr 14;9(4):e026169. doi: 10.1136/bmjopen-2018-026169 (PMC6500300; doi:10.1136/bmjopen-2018-026169), 2019-04-14
Supplement: bmjopen-2018-026169supp001.pdf [file bmjopen-2018-026169supp001.pdf]

Supplement 1. Geriatric Depression Scale, MOS Social Support Scale, and SF-36 Health Survey results by group

| Measure                     | Baseline Values      |                           | Change over Time (adjusted for baseline HHIE score) |                                     |                                                  | Effect Size |
|-----------------------------|----------------------|---------------------------|-----------------------------------------------------|-------------------------------------|--------------------------------------------------|-------------|
|                             | Control Median (IQR) | Intervention Median (IQR) | Control Mean $\Delta$ (95% CI)                      | Intervention Mean $\Delta$ (95% CI) | Difference between Groups Mean $\Delta$ (95% CI) |             |
| Geriatric Depression Scale  | 2 (1, 6)             | 2 (1, 3)                  | -0.9 (-1.8, 0.1)                                    | -0.9 (-1.8, 0.2)                    | 0 (-1.3, 1.3)                                    | 0           |
| MOS Social Support Scale    |                      |                           |                                                     |                                     |                                                  |             |
| MOS Total Score             | 76 (50, 86)          | 76 (49, 93)               | 5.0 (0.8, 9.1)                                      | 0.8 (-3.0, 4.6)                     | -4.2 (-9.9, 1.6)                                 | -0.38       |
| Emotional Support           | 69 (38, 84)          | 75 (50, 91)               | 6.8 (1.4, 12.1)                                     | 1.1 (-4.0, 6.1)                     | -5.7 (-13.2, 1.8)                                | -0.39       |
| Tangible Support            | 88 (50, 100)         | 75 (44, 94)               | 2.3 (-2.9, 7.5)                                     | 1.5 (-3.4, 6.4)                     | -0.8 (-8.1, 6.4)                                 | -0.06       |
| Affectionate Support        | 92 (50, 100)         | 83 (50, 100)              | 4.2 (-0.6, 9.0)                                     | -0.4 (-4.9, 4.2)                    | -4.6 (-11.2, 2.2)                                | -0.35       |
| Positive Social Interaction | 75 (50, 100)         | 75 (50, 100)              | 2.5 (-2.0, 7.0)                                     | 0.4 (-3.8, 4.7)                     | -2.1 (-8.3, 4.2)                                 | -0.17       |
| Additional Item             | 63 (50, 75)          | 75 (50, 100)              | 8.5 (1.0, 16.0)                                     | 0.6 (-6.4, 7.5)                     | -7.9 (-18.4, 2.5)                                | -0.39       |
| SF-36 Health Survey         |                      |                           |                                                     |                                     |                                                  |             |
| Physical functioning        | 80 (55, 95)          | 85 (65, 90)               | 4.0 (-3.2, 11.2)                                    | 0.9 (-5.8, 7.7)                     | -3.1 (-13.1, 7.0)                                | -0.16       |
| Physical role limitations   | 75 (50, 100)         | 75 (50, 100)              | -2.4 (-14.9, 10.2)                                  | 1.4 (-10.4, 13.2)                   | 3.8 (-13.8, 21.3)                                | 0.11        |
| Emotional role limitations  | 100 (33, 100)        | 100 (67, 100)             | 0.1 (-10.4, 10.5)                                   | -3.8 (-13.7, 6.0)                   | -3.9 (-18.5, 10.7)                               | -0.15       |
| Energy/fatigue              | 60 (50, 80)          | 60 (45, 75)               | 0.5 (-4.2, 5.2)                                     | 3.0 (-1.4, 7.4)                     | 2.5 (-4.1, 9.1)                                  | 0.19        |
| Emotional well-being        | 80 (64, 88)          | 80 (72, 92)               | 0.7 (-3.2, 4.7)                                     | -2.0 (-5.7, 1.7)                    | -2.7 (-8.3, 2.7)                                 | -0.25       |
| Social functioning          | 75 (63, 100)         | 88 (63, 100)              | 0.0 (-6.5, 6.6)                                     | 0.0 (-6.2, 6.1)                     | 0.0 (-9.2, 9.1)                                  | 0           |
| Pain                        | 68 (45, 90)          | 68 (55, 80)               | 0.6 (-5.7, 6.9)                                     | 5.6 (-0.3, 11.5)                    | 5.0 (-3.7, 13.8)                                 | 0.29        |
| General Health              | 75 (60, 85)          | 70 (65, 85)               | -0.3 (-4.8, 4.2)                                    | 1.4 (-2.9, 5.7)                     | 1.7 (-4.6, 8.0)                                  | 0.14        |

Notes: IQR: interquartile range, Mean  $\Delta$ : mean change, 95% CI: 95% confidence interval, \* $p < 0.05$

**Supplement 2.** Distribution of COSI responses at follow-up, by group (Control N=26; Intervention N=31) and overall (N=57).

| Situation                                                   | Amount of change experienced |                           |                             |                 |                         |
|-------------------------------------------------------------|------------------------------|---------------------------|-----------------------------|-----------------|-------------------------|
|                                                             | Worse<br>n (%)               | No<br>difference<br>n (%) | Slightly<br>better<br>n (%) | Better<br>n (%) | Much<br>better<br>n (%) |
| 1. Conversations with 1 or 2 people in a quiet environment. |                              |                           |                             |                 |                         |
| Control                                                     | 0 (0)                        | 10 (38.5)                 | 6 (23.1)                    | 6 (23.1)        | 4 (15.4)                |
| Intervention                                                | 0 (0)                        | 9 (29.0)                  | 7 (22.6)                    | 13 (41.9)       | 2 (6.5)                 |
| Overall                                                     | 0 (0)                        | 19 (33.3)                 | 13 (22.8)                   | 19 (33.3)       | 6 (10.5)                |
| 2. Conversations with 1 or 2 people in a noisy environment. |                              |                           |                             |                 |                         |
| Control                                                     | 1 (3.9)                      | 12 (46.2)                 | 7 (26.9)                    | 6 (23.1)        | 0 (0)                   |
| Intervention                                                | 1 (3.2)                      | 13 (41.9)                 | 8 (25.8)                    | 9 (29.0)        | 0 (0)                   |
| Overall                                                     | 2 (3.5)                      | 25 (43.9)                 | 15 (26.3)                   | 15 (26.3)       | 0 (0)                   |
| 3. Conversations with a group in a quiet environment.       |                              |                           |                             |                 |                         |
| Control                                                     | 0 (0)                        | 8 (30.8)                  | 7 (26.9)                    | 8 (30.8)        | 3 (11.5)                |
| Intervention                                                | 0 (0)                        | 8 (25.8)                  | 11 (35.5)                   | 10 (32.3)       | 2 (6.5)                 |
| Overall                                                     | 0 (0)                        | 16 (28.1)                 | 18 (31.6)                   | 18 (31.6)       | 5 (8.7)                 |
| 4. Conversations with a group in a noisy environment.       |                              |                           |                             |                 |                         |
| Control                                                     | 1 (3.9)                      | 10 (38.5)                 | 10 (38.5)                   | 4 (15.4)        | 1 (3.9)                 |
| Intervention                                                | 1 (3.2)                      | 15 (48.4)                 | 11 (35.5)                   | 3 (9.7)         | 1 (3.2)                 |
| Overall                                                     | 2 (3.5)                      | 25 (43.9)                 | 21 (36.8)                   | 7 (12.3)        | 2 (3.5)                 |
| 5. Hearing the television or radio at normal volume.        |                              |                           |                             |                 |                         |
| Control                                                     | 0 (0)                        | 16 (61.5)                 | 7 (26.9)                    | 3 (11.5)        | 0 (0)                   |
| Intervention                                                | 0 (0)                        | 17 (54.8)                 | 6 (19.4)                    | 7 (22.6)        | 1 (3.2)                 |
| Overall                                                     | 0 (0)                        | 33 (57.9)                 | 13 (22.8)                   | 10 (17.5)       | 1 (1.8)                 |
| 6. Speaking with a familiar person on the phone.            |                              |                           |                             |                 |                         |
| Control                                                     | 0 (0)                        | 17 (65.4)                 | 3 (11.5)                    | 5 (19.2)        | 1 (3.9)                 |
| Intervention                                                | 0 (0)                        | 22 (71.0)                 | 2 (6.5)                     | 6 (19.4)        | 1 (3.2)                 |
| Overall                                                     | 0 (0)                        | 39 (68.4)                 | 5 (8.8)                     | 11 (19.3)       | (3.5)                   |
| 7. Speaking with an unfamiliar person on the phone.         |                              |                           |                             |                 |                         |
| Control                                                     | 1 (3.9)                      | 17 (65.4)                 | 5 (19.2)                    | 3 (11.5)        | 0 (0)                   |
| Intervention                                                | 1 (3.2)                      | 19 (61.3)                 | 7 (22.6)                    | 3 (9.7)         | 1 (3.2)                 |
| Overall                                                     | 2 (3.5)                      | 36 (63.2)                 | 12 (21.0)                   | 6 (10.5)        | 1 (1.8)                 |
| 8. Hearing the phone ring from another room.                |                              |                           |                             |                 |                         |
| Control                                                     | 0 (0)                        | 22 (84.6)                 | 2 (7.7)                     | 2 (7.7)         | 0 (0)                   |
| Intervention                                                | 1 (3.2)                      | 22 (71.0)                 | 6 (19.4)                    | 1 (3.2)         | 1 (3.2)                 |
| Overall                                                     | 1 (1.8)                      | 44 (77.2)                 | 8 (14.0)                    | 3 (5.2)         | 1 (1.8)                 |

|                                                                                                                      |         |           |           |           |         |
|----------------------------------------------------------------------------------------------------------------------|---------|-----------|-----------|-----------|---------|
| 9. Hearing the front door bell or someone knocking on the door.                                                      |         |           |           |           |         |
| Control                                                                                                              | 0 (0)   | 19 (73.1) | 5 (19.2)  | 2 (7.7)   | 0 (0)   |
| Intervention                                                                                                         | 1 (3.2) | 21 (67.7) | 5 (16.1)  | 2 (6.5)   | 2 (6.5) |
| Overall                                                                                                              | 1 (1.8) | 40 (70.2) | 10 (17.5) | 4 (7.0)   | 2 (3.5) |
| 10. Hearing traffic (while walking outside or driving)                                                               |         |           |           |           |         |
| Control                                                                                                              | 1 (3.9) | 19 (73.1) | 4 (15.4)  | 2 (7.7)   | 0 (0)   |
| Intervention                                                                                                         | 1 (3.2) | 23 (74.2) | 3 (9.7)   | 3 (9.7)   | 1 (3.2) |
| Overall                                                                                                              | 2 (3.5) | 42 (73.7) | 7 (12.3)  | 5 (8.7)   | 1 (1.8) |
| 11. Your amount of social contact (such as attending more social events or social situations or going out in public) |         |           |           |           |         |
| Control                                                                                                              |         |           |           |           |         |
| Intervention                                                                                                         | 0 (0)   | 14 (53.9) | 6 (23.1)  | 5 (19.2)  | 1 (3.9) |
| Overall                                                                                                              | 1 (3.2) | 18 (58.1) | 5 (16.1)  | 7 (22.6)  | 0 (0)   |
|                                                                                                                      | 1 (1.8) | 32 (56.1) | 11 (19.3) | 12 (21.0) | 1 (1.8) |
| 12. Feeling embarrassed or stupid.                                                                                   |         |           |           |           |         |
| Control                                                                                                              | 0 (0)   | 11 (42.3) | 4 (15.4)  | 9 (35.6)  | 2 (7.7) |
| Intervention                                                                                                         | 0 (0)   | 17 (54.8) | 9 (29.0)  | 2 (6.5)   | 3 (9.7) |
| Overall                                                                                                              | 0 (0)   | 28 (49.1) | 13 (22.8) | 11 (19.3) | 5 (8.7) |
| 13. Feeling left out.                                                                                                |         |           |           |           |         |
| Control                                                                                                              | 0 (0)   | 11 (42.3) | 7 (26.9)  | 8 (30.8)  | 0 (0)   |
| Intervention                                                                                                         | 0 (0)   | 18 (58.1) | 8 (25.8)  | 3 (9.7)   | 2 (6.5) |
| Overall                                                                                                              | 0 (0)   | 29 (50.9) | 15 (26.3) | 11 (19.3) | 2 (3.5) |
| 14. Feeling upset or angry.                                                                                          |         |           |           |           |         |
| Control                                                                                                              | 0 (0)   | 14 (53.9) | 5 (19.2)  | 7 (26.9)  | 0 (0)   |
| Intervention                                                                                                         | 0 (0)   | 17 (54.8) | 10 (32.3) | 2 (6.5)   | 2(6.5)  |
| Overall                                                                                                              | 0 (0)   | 31 (54.4) | 15 (26.3) | 9 (15.8)  | 2 (3.5) |
| 15. Attending church or group meetings                                                                               |         |           |           |           |         |
| Control                                                                                                              |         |           |           |           |         |
| Intervention                                                                                                         | 0 (0)   | 18 (69.2) | 4 (15.4)  | 4 (15.4)  | 0 (0)   |
| Overall                                                                                                              | 0 (0)   | 24 (77.4) | 3 (9.7)   | 2 (6.5)   | 2 (6.5) |
|                                                                                                                      | 0 (0)   | 42 (73.7) | 7 (12.3)  | 6 (10.5)  | 2 (3.5) |

**Supplement 3.** Program Evaluation Questions and Distribution of Responses (Intervention N=33; Control N=24).

| <b>Exercise sessions (Intervention Participants)</b>                                                      | <b>Strongly Agree<br/>n (%)</b> | <b>Agree<br/>n (%)</b> | <b>Disagree<br/>n (%)</b> | <b>Strongly Disagree<br/>n (%)</b> | <b>Don't know<br/>n (%)</b> |
|-----------------------------------------------------------------------------------------------------------|---------------------------------|------------------------|---------------------------|------------------------------------|-----------------------------|
| Overall, I was satisfied with the exercise program.                                                       | 18 (55)                         | 15 (44)                | 0 (0)                     | 0 (0)                              | 0 (0)                       |
| The exercise program was fun.                                                                             | 15 (45)                         | 18 (55)                | 0 (0)                     | 0 (0)                              | 0 (0)                       |
| I did <u>not</u> enjoy the exercise sessions.                                                             | 0 (0)                           | 2 (6)                  | 10 (30)                   | 20 (61)                            | 1 (3)                       |
| The exercises were too easy.                                                                              | 0 (0)                           | 2 (6)                  | 10 (30)                   | 20 (61)                            | 1 (3)                       |
| The exercise room was suitable for the program.                                                           | 9 (27)                          | 21 (64)                | 3 (9)                     | 0 (0)                              | 0 (0)                       |
| The fitness instructor clearly demonstrated the exercises.                                                | 17 (52)                         | 16 (48)                | 0 (0)                     | 0 (0)                              | 0 (0)                       |
| The fitness instructor suggested modifications for the exercises to accommodate different fitness levels. | 10 (30)                         | 22 (67)                | 1 (3)                     | 0 (0)                              | 0 (0)                       |
| The fitness instructor was encouraging.                                                                   | 19 (58)                         | 14 (42)                | 0 (0)                     | 0 (0)                              | 0 (0)                       |
| The fitness instructor was approachable.                                                                  | 19 (59)                         | 13 (41)                | 0 (0)                     | 0 (0)                              | 0 (0)                       |
| The fitness instructor spoke clearly.                                                                     | 9 (27)                          | 20 (61)                | 4 (12)                    | 0 (0)                              | 0 (0)                       |
| There were a good variety of exercises.                                                                   | 14 (42)                         | 18 (55)                | 1 (3)                     | 0 (0)                              | 0 (0)                       |
| I have increased my physical activity level outside of the program.                                       | 9 (27)                          | 16 (48)                | 5 (15)                    | 0 (0)                              | 3 (9)                       |
| By participating, I feel I improved my strength and stamina.                                              | 9 (27)                          | 20 (61)                | 2 (6)                     | 0 (0)                              | 2 (6)                       |
| By participating, I feel I improved my balance.                                                           | 7 (21)                          | 15 (45)                | 6 (18)                    | 0 (0)                              | 5 (15)                      |
| By participating, I feel I improved my flexibility.                                                       | 6 (18)                          | 23 (70)                | 2 (6)                     | 0 (0)                              | 2 (6)                       |
| As a result of the program, I walk more often.                                                            | 8 (24)                          | 17 (52)                | 7 (21)                    | 0 (0)                              | 1 (3)                       |
| <b>Health Education Sessions (Intervention Participants)</b>                                              | <b>Strongly Agree<br/>n (%)</b> | <b>Agree<br/>n (%)</b> | <b>Disagree<br/>n (%)</b> | <b>Strongly Disagree<br/>n (%)</b> | <b>Don't know<br/>n (%)</b> |
| The presentation topics were interesting.                                                                 | 13 (39)                         | 20 (61)                | 0 (0)                     | 0 (0)                              | 0 (0)                       |
| There were a good variety of presentation topics.                                                         | 12 (36)                         | 21 (64)                | 0 (0)                     | 0 (0)                              | 0 (0)                       |
| The information presented encouraged group discussions.                                                   | 17 (52)                         | 16 (48)                | 0 (0)                     | 0 (0)                              | 0 (0)                       |
| I did <u>not</u> enjoy the group discussions.                                                             | 0 (0)                           | 1 (3)                  | 15 (45)                   | 17 (52)                            | 0 (0)                       |
| I often participated in the group discussions.                                                            | 5 (15)                          | 27 (82)                | 1 (3)                     | 0 (0)                              | 0 (0)                       |
| I learned about a healthy lifestyle for the health education sessions.                                    | 10 (30)                         | 20 (61)                | 3 (9)                     | 0 (0)                              | 0 (0)                       |
| I enjoyed the student presentations.                                                                      | 14 (42)                         | 18 (55)                | 1 (3)                     | 0 (0)                              | 0 (0)                       |
| I would have liked more student presentations.                                                            | 4 (12)                          | 17 (52)                | 8 (24)                    | 1 (3)                              | 3 (9)                       |
| I enjoyed the guest speaker presentations.                                                                | 14 (45)                         | 13 (42)                | 1 (3)                     | 1 (3)                              | 2 (6)                       |
| I would have liked more guest speaker                                                                     | 7 (23)                          | 14 (45)                | 4 (13)                    | 1 (3)                              | 5 (16)                      |

|                                                                                                                      |                                 |                        |                           |                                    |                             |
|----------------------------------------------------------------------------------------------------------------------|---------------------------------|------------------------|---------------------------|------------------------------------|-----------------------------|
| presentations.                                                                                                       |                                 |                        |                           |                                    |                             |
| The information presented was difficult to understand.                                                               | 0 (0)                           | 0 (0)                  | 20 (67)                   | 10 (33)                            | 0 (0)                       |
| I could see the speakers clearly.                                                                                    | 13 (42)                         | 17 (55)                | 1 (3)                     | 0 (0)                              | 0 (0)                       |
| I could hear the speakers clearly.                                                                                   | 14 (45)                         | 15 (48)                | 1 (3)                     | 1 (3)                              | 0 (0)                       |
| <b>Walk Talk and Listen Program Overall (Intervention Participants)</b>                                              | <b>Strongly Agree<br/>n (%)</b> | <b>Agree<br/>n (%)</b> | <b>Disagree<br/>n (%)</b> | <b>Strongly Disagree<br/>n (%)</b> | <b>Don't know<br/>n (%)</b> |
| The program helped me to feel more comfortable in social situations.                                                 | 2 (12)                          | 13 (76)                | 1 (6)                     | 0 (0)                              | 1 (6)                       |
| The program helped to improve my emotional and mental wellbeing.                                                     | 3 (18)                          | 10 (59)                | 1 (6)                     | 0 (0)                              | 3 (18)                      |
| Overall, my lifestyle is healthier since I joined the program.                                                       | 3 (18)                          | 10 (59)                | 1 (6)                     | 0 (0)                              | 3 (18)                      |
| I am confident that I will continue with regular exercise after the program ends.                                    | 5 (29)                          | 10 (59)                | 2 (12)                    | 0 (0)                              | 0 (0)                       |
| <b>Group Auditory Rehab (GAR) sessions (Intervention and Control Participants)</b>                                   | <b>Strongly Agree<br/>n (%)</b> | <b>Agree<br/>n (%)</b> | <b>Disagree<br/>n (%)</b> | <b>Strongly Disagree<br/>n (%)</b> | <b>Don't know<br/>n (%)</b> |
| The meeting room was suitable for the program.                                                                       | 10 (37)                         | 17 (63)                |                           | 0 (0)                              | 0 (0)                       |
| The GAR sessions helped me to recognize and better accept my hearing loss.                                           | 22 (39)                         | 31 (55)                | 2 (3)                     | 0 (0)                              | 2 (3)                       |
| The GAR sessions helped me to become more self-confident in speaking out about my hearing loss in social situations. | 24 (42)                         | 32 (56)                | 0 (0.0)                   | 0 (0)                              | 1 (2)                       |
| The GAR sessions helped to improve my stress management skills.                                                      | 6 (11)                          | 36 (63)                | 7 (12)                    | 0 (0)                              | 8 (14)                      |
| The GAR sessions helped me to change my attitude about hearing loss for the better.                                  | 19 (33)                         | 35 (61)                | 2 (4)                     | 0 (0)                              | 1 (2)                       |
| The GAR sessions helped me gain more problem solving skills.                                                         | 9 (16)                          | 41 (73)                | 1 (2)                     | 0 (0)                              | 5 (9)                       |

Notes: There were no differences between control and intervention groups for GAR session evaluation questions (all  $p > 0.05$ )
